# Supplementary material
Source: PubMed Central journal article supplement (PMC4891271)
Supplement: NIHMS748600-supplement-Supplemental_Data_File___doc___xls___jpg_etc__.pdf [file NIHMS748600-supplement-Supplemental_Data_File___doc___xls___jpg_etc__.pdf]

Table S1. Correlations between baseline apnea-hypopnea index (AHI) and baseline mean sleep parameters

|                         | AHI   | DIARY:<br>SOL | DIARY:<br>WASO | DIARY:<br>TWT | DIARY:<br>SE | ACTIGRAPHY:<br>SE | PSQI |
|-------------------------|-------|---------------|----------------|---------------|--------------|-------------------|------|
| AHI <i>r</i>            | 1.00  |               |                |               |              |                   |      |
| p-value                 | --    |               |                |               |              |                   |      |
| N                       | 134   |               |                |               |              |                   |      |
| DIARY: SOL <i>r</i>     | 0.04  | 1.00          |                |               |              |                   |      |
| p-value                 | 0.64  | --            |                |               |              |                   |      |
| N                       | 134   | 134           |                |               |              |                   |      |
| DIARY: WASO <i>r</i>    | -0.02 | 0.22          | 1.00           |               |              |                   |      |
| p-value                 | 0.86  | 0.01          | --             |               |              |                   |      |
| N                       | 134   | 134           | 134            |               |              |                   |      |
| DIARY: TWT <i>r</i>     | 0.04  | 0.66          | 0.68           | 1.00          |              |                   |      |
| p-value                 | 0.62  | <.001         | <.001          | --            |              |                   |      |
| N                       | 134   | 134           | 134            | 134           |              |                   |      |
| DIARY: SE <i>r</i>      | -0.05 | -0.62         | -0.68          | -0.96         | 1.00         |                   |      |
| p-value                 | 0.59  | <.001         | <.001          | <.001         | --           |                   |      |
| N                       | 134   | 134           | 134            | 134           | 134          |                   |      |
| ACTIGRAPHY: SE <i>r</i> | -0.06 | -0.31         | -0.25          | -0.36         | 0.31         | 1.00              |      |
| p-value                 | 0.51  | <.001         | .004           | <.001         | <.001        | --                |      |
| N                       | 134   | 134           | 134            | 134           | 134          | 134               |      |
| PSQI <i>r</i>           | -0.02 | 0.48          | 0.25           | 0.49          | -0.53        | -0.06             | 1.00 |
| p-value                 | 0.80  | <.001         | .004           | <.001         | <.001        | 0.51              | --   |
| N                       | 134   | 134           | 134            | 134           | 134          | 134               | 134  |

AHI=apnea-hypopnea index; SOL=sleep onset latency; WASO=wake after sleep onset; TWT=total wake time at night; SE=sleep efficiency; PSQI=Pittsburgh Sleep Quality Index

Table S2. Correlations between baseline apnea-hypopnea index (AHI) and the change in sleep parameters (baseline to 6 months follow-up) for participants randomized to cognitive behavioral therapy for insomnia

|                            | AHI   | DIARY:<br>SOL | DIARY:<br>WASO | DIARY:<br>TWT | DIARY:<br>SE | ACTIGRAPHY:<br>SE | PSQI |
|----------------------------|-------|---------------|----------------|---------------|--------------|-------------------|------|
| AHI <i>r</i>               | 1.00  |               |                |               |              |                   |      |
| p-value                    | --    |               |                |               |              |                   |      |
| N                          | 86    |               |                |               |              |                   |      |
| DIARY: SOL <i>r</i>        | 0.03  | 1.00          |                |               |              |                   |      |
| p-value                    | 0.81  | --            |                |               |              |                   |      |
| N                          | 66    | 66            |                |               |              |                   |      |
| DIARY: WASO <i>r</i>       | -0.04 | 0.39          | 1.00           |               |              |                   |      |
| p-value                    | 0.77  | .001          | --             |               |              |                   |      |
| N                          | 66    | 66            | 66             |               |              |                   |      |
| DIARY: TWT <i>r</i>        | 0.00  | 0.74          | 0.73           | 1.00          |              |                   |      |
| p-value                    | 0.99  | <.001         | <.001          | --            |              |                   |      |
| N                          | 66    | 66            | 66             | 66            |              |                   |      |
| DIARY: SE <i>r</i>         | -0.01 | -0.73         | -0.76          | -0.95         | 1.00         |                   |      |
| p-value                    | 0.92  | <.001         | <.001          | <.001         | --           |                   |      |
| N                          | 66    | 66            | 66             | 66            | 66           |                   |      |
| ACTIGRAPHY:<br>SE <i>r</i> | -0.03 | -0.21         | -0.24          | -0.23         | 0.13         | 1.00              |      |
| p-value                    | 0.82  | 0.09          | 0.06           | 0.07          | 0.32         | --                |      |
| N                          | 67    | 64            | 64             | 64            | 64           | 67                |      |
| PSQI <i>r</i>              | 0.06  | 0.61          | 0.45           | 0.55          | -0.60        | 0.04              | 1.00 |
| p-value                    | 0.63  | <.001         | .002           | <.001         | <.001        | 0.76              | --   |
| N                          | 73    | 65            | 65             | 65            | 65           | 66                | 73   |

AHI=apnea-hypopnea index; SOL=sleep onset latency; WASO=wake after sleep onset; TWT=total wake time at night; SE=sleep efficiency; PSQI=Pittsburgh Sleep Quality Index

Table S3. Correlations between baseline apnea-hypopnea index (AHI) and the change in sleep parameters (baseline to 6 months follow-up) for participants randomized to control condition

|                         | AHI   | DIARY:<br>SOL | DIARY:<br>WASO | DIARY:<br>TWT | DIARY:<br>SE | ACTIGRAPHY:<br>SE | PSQI |
|-------------------------|-------|---------------|----------------|---------------|--------------|-------------------|------|
| AHI <i>r</i>            | 1     |               |                |               |              |                   |      |
| p-value                 | --    |               |                |               |              |                   |      |
| N                       | 48    |               |                |               |              |                   |      |
| DIARY: SOL <i>r</i>     | -0.17 | 1             |                |               |              |                   |      |
| p-value                 | 0.26  | --            |                |               |              |                   |      |
| N                       | 44    | 44            |                |               |              |                   |      |
| DIARY: WASO <i>r</i>    | -0.02 | 0.00          | 1              |               |              |                   |      |
| p-value                 | 0.89  | 1.00          | --             |               |              |                   |      |
| N                       | 44    | 44            | 44             |               |              |                   |      |
| DIARY: TWT <i>r</i>     | -0.18 | 0.45          | 0.73           | 1             |              |                   |      |
| p-value                 | 0.24  | 0.002         | <.001          | --            |              |                   |      |
| N                       | 44    | 44            | 44             | 44            |              |                   |      |
| DIARY: SE <i>r</i>      | 0.12  | -0.40         | -0.76          | -0.98         | 1            |                   |      |
| p-value                 | 0.42  | 0.01          | <.001          | <.001         | --           |                   |      |
| N                       | 44    | 44            | 44             | 44            | 44           |                   |      |
| ACTIGRAPHY: SE <i>r</i> | 0.01  | -0.22         | 0.05           | -0.20         | 0.17         | 1                 |      |
| p-value                 | 0.93  | 0.15          | 0.75           | 0.18          | 0.28         | --                |      |
| N                       | 46    | 44            | 44             | 44            | 44           | 46                |      |
| PSQI <i>r</i>           | -0.05 | 0.34          | 0.28           | 0.43          | -0.37        | 0.09              | 1    |
| p-value                 | 0.75  | 0.03          | 0.06           | 0.004         | 0.01         | 0.55              | --   |
| N                       | 46    | 43            | 43             | 43            | 43           | 45                | 46   |

AHI=apnea-hypopnea index; SOL=sleep onset latency; WASO=wake after sleep onset; TWT=total wake time at night; SE=sleep efficiency; PSQI=Pittsburgh Sleep Quality Index
